# Supplementary material for: “It's like two worlds apart”: an analysis of vulnerable patient handover practices at discharge from hospital
Source: PubMed Central journal article supplement — BMJ Qual Saf. 2012 Oct 29;21(Suppl_1):i67–75. doi: 10.1136/bmjqs-2012-001174 (PMC3551198; doi:10.1136/bmjqs-2012-001174), 2012-10-29
Supplement: bmjqs-2012-001174-s1.pdf [file bmjqs-2012-001174-s1.pdf]

**Appendix 1: Screening tool for patient's vulnerability**

|                                                                   |  |
|-------------------------------------------------------------------|--|
| <b>Patient's name</b>                                             |  |
| Country of origin                                                 |  |
| Contact details                                                   |  |
| Primary diagnosis                                                 |  |
| Secondary diagnosis                                               |  |
| Multiple drugs (more than 6)                                      |  |
| List of drugs                                                     |  |
| Level of education                                                |  |
| Occupation                                                        |  |
| Socio economic status                                             |  |
| Language barrier                                                  |  |
| Does the patient understand the disease and medical instructions? |  |
| Comments                                                          |  |

**Appendix 2: Patient Profiles**

| Diagnosis<br>(ICD-10)<br>/polypharmacy                          | Sex<br>M/F | Age<br>years | Referred<br>from PC<br><br>yes/no | Number of drugs<br>at: |                       | Discharged to: |                 | Definition of vulnerability (living alone, low socio-economic status, low education, difficulties in comprehending information provided) |
|-----------------------------------------------------------------|------------|--------------|-----------------------------------|------------------------|-----------------------|----------------|-----------------|------------------------------------------------------------------------------------------------------------------------------------------|
|                                                                 |            |              |                                   | hospital<br>admission  | hospital<br>discharge | Home           | Nursing<br>home |                                                                                                                                          |
| Severe COPD<br>/Polypharmacy                                    | M          | 77           | no                                | 10                     | 10                    | X              |                 | low socioeconomic status, low education, difficulties in comprehending information provided.                                             |
| Onset of<br>Ulcerative<br>colitis /<br>Acute MI<br>Polypharmacy | F          | 87           | yes                               | 7                      | 7                     | X              |                 | low socioeconomic status, low education, difficulties in comprehending information provided, lived in a deprived area.                   |
| Nephrotic<br>Syndrome<br>/Polypharmacy                          | F          | 69           | No                                | 10                     | 13                    | X              |                 | low education, difficulties in comprehending information provided, lived alone, still working                                            |
| Acute<br>pyelonephritis<br>/Polypharmacy                        | M          | 84           | No                                | 6                      | 6                     | X              |                 | Linguistic Barrier , low socioeconomic status, low education, difficulties in comprehending information provided.                        |
| Celulitis and<br>Foot Abscess<br>Polypharmacy                   | F          | 67           | No                                | Not<br>available       | 16                    | X              |                 | low socioeconomic status, low education, difficulties in comprehending information provided, lived alone                                 |

|                                                                                                   |   |               |    |    |    |   |  |                                                                                                                             |
|---------------------------------------------------------------------------------------------------|---|---------------|----|----|----|---|--|-----------------------------------------------------------------------------------------------------------------------------|
| Bilateral carpal tunnel inflammation, /COPD/<br>Polypharmacy                                      | F | 73            | No | 11 | 11 | X |  | low socioeconomic status, low education, difficulties in comprehending information provided, lived alone in a deprived area |
| Cardiac Failure, Paroxysmal AF<br>/Polypharmacy                                                   | F | Not available | No | 6  | 7  | X |  | low socioeconomic status, low education, difficulties in comprehending information provided.                                |
| Mitral Valve replacement<br>/Hypertension-<br>Type II DM-<br>CVA<br>Polypharmacy                  | F | 66            | No | 7  | 7  | X |  | Linguistic Barrier, low socioeconomic status, low education, difficulties in comprehending information provided.            |
| Colorectal Cancer<br>/COPD-<br>Hypertension-<br>Obesity-<br>Chronic heart failure<br>Polypharmacy | F | 73            | No | 7  | 7  | X |  | low education, difficulties in comprehending information provided.                                                          |
| Pancreatitis                                                                                      | M | 56            | No | 11 | 13 | X |  | low socioeconomic status, low education                                                                                     |

|                                                                       |   |    |    |   |   |   |  |                                                                                              |
|-----------------------------------------------------------------------|---|----|----|---|---|---|--|----------------------------------------------------------------------------------------------|
| /Type II DM,<br>bile duct<br>cancer                                   |   |    |    |   |   |   |  |                                                                                              |
| Cardiac stent<br><br>/Polypharmacy                                    | M | 81 | No | 8 | 9 | X |  | low socioeconomic status, low education, difficulties in comprehending information provided. |
| Surgery for<br>Cancer of<br>Rectum<br><br>/Type II DM<br>Polypharmacy | M | 63 | No | 7 | 7 | X |  | low socioeconomic status, low education                                                      |
